# Supplementary material for: Synthesis and conductivity of hyperbranched poly(triazolium)s with various end-capping groups
Source: Royal Society of Chemistry journal article supplement (doi:10.1039/c5py01735a), 2015-11-17
Supplement: c5py01735a1.pdf [file c5py01735a1.pdf]

Supporting Information for

**Synthesis and conductivity of hyperbranched poly(triazolium)s with various end-capping groups**

Jianhua Wu, Jie Chen, Junfang Wang, Xiaojuan Liao, Meiran Xie\* and Ruyi Sun\*

*School of Chemistry and Molecular Engineering, East China Normal University, Shanghai 200241, China*

*E-mail: mrxie@chem.ecnu.edu.cn; Tel: +86 21 54340058; Fax: +86 21 54340058*

*E-mail: rysun@chem.ecnu.edu.cn; Tel: +86 21 54340105; Fax: +86 21 54340105*

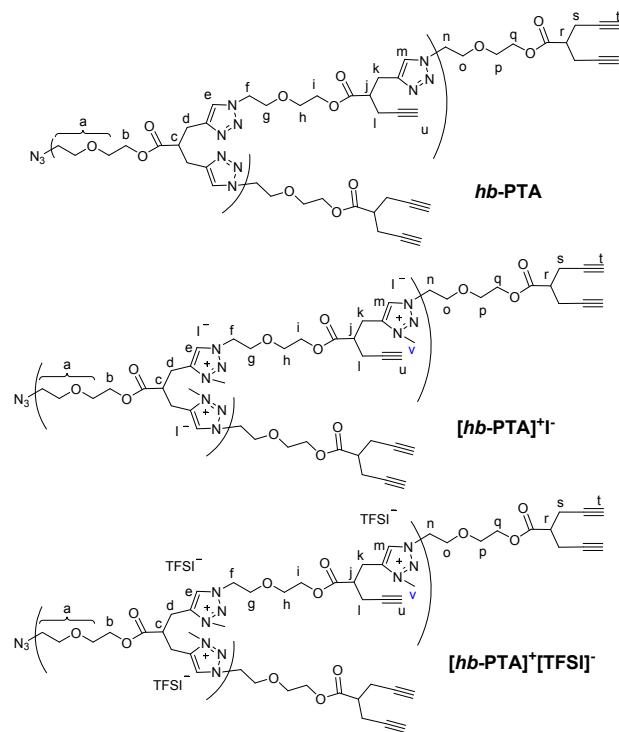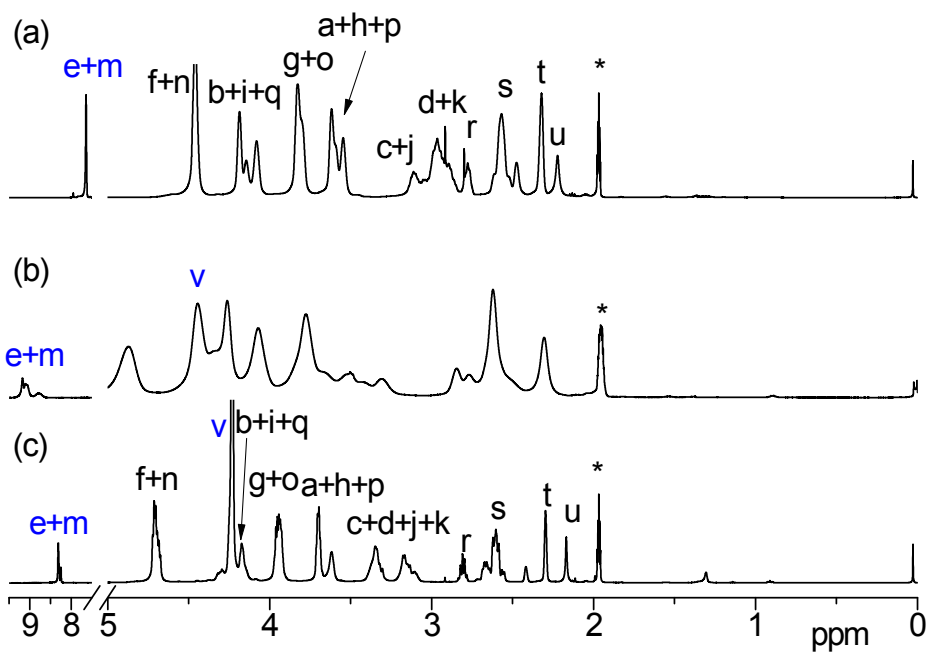

Fig. S1  $^1H$  NMR spectra of (a)  $hb-PTA$ , (b)  $[hb-PTA]^+I^-$ , and (c)  $[hb-PTA]^+[TFSI]^-$  in  $CD_3CN$ .

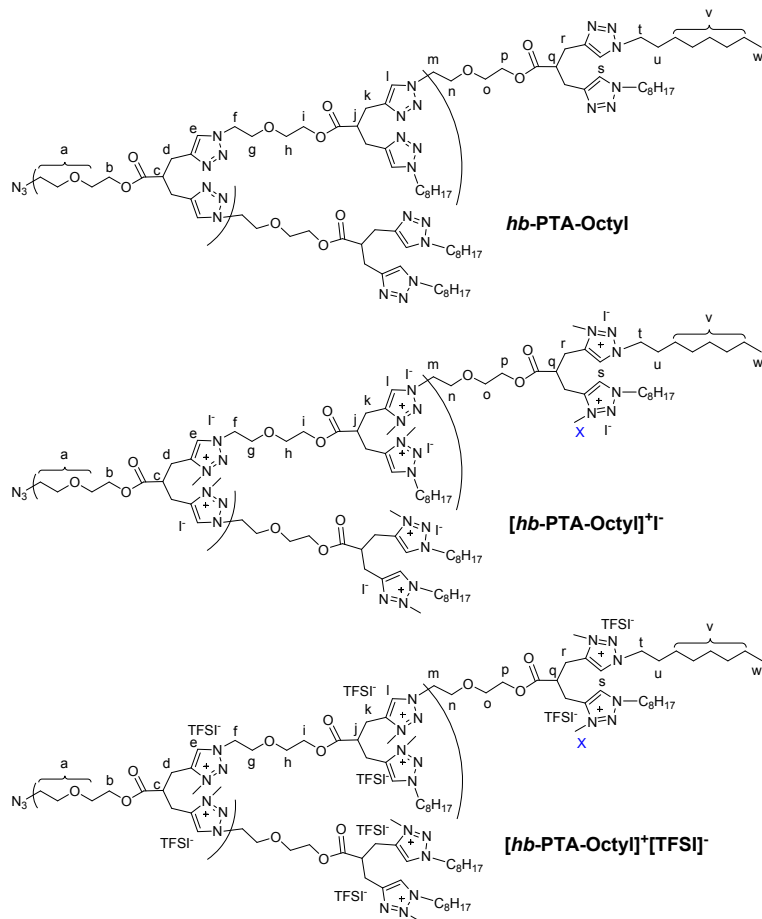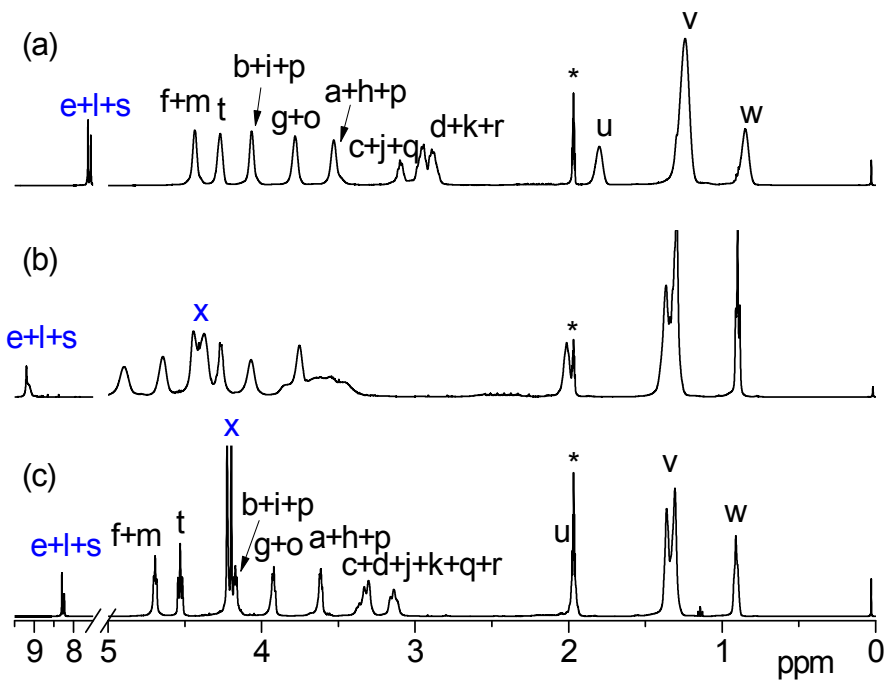

**Fig. S2**  $^1\text{H}$  NMR spectra of (a) *hb*-PTA-Octyl, (b) [*hb*-PTA-Octyl]<sup>+</sup>I<sup>-</sup>, and (c) [*hb*-PTA-Octyl]<sup>+</sup>[TFSI]<sup>-</sup> in CD<sub>3</sub>CN.

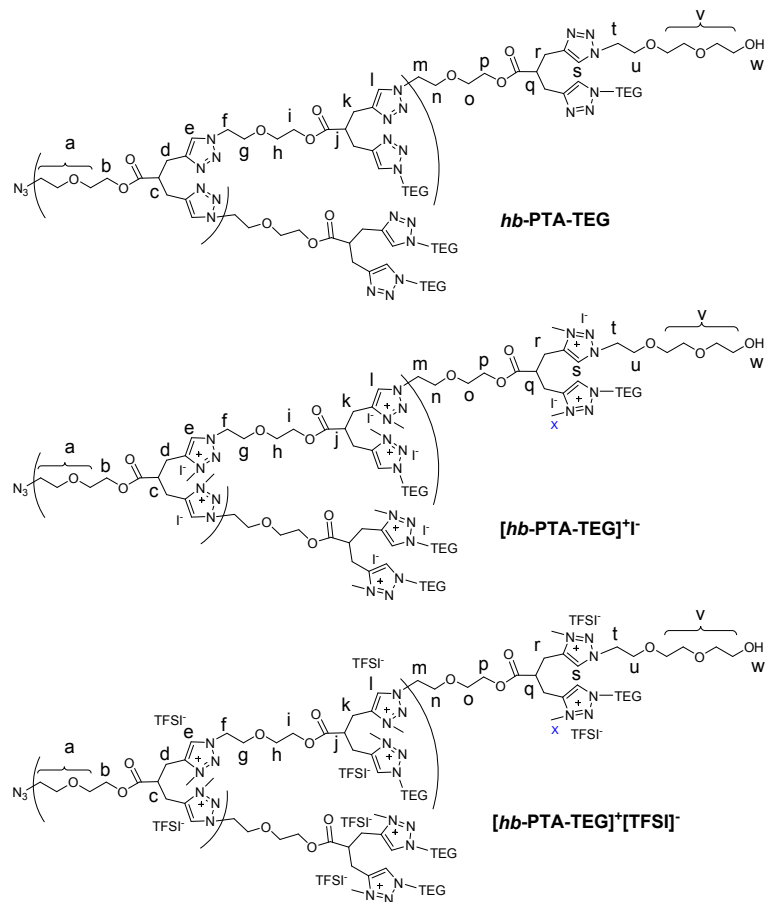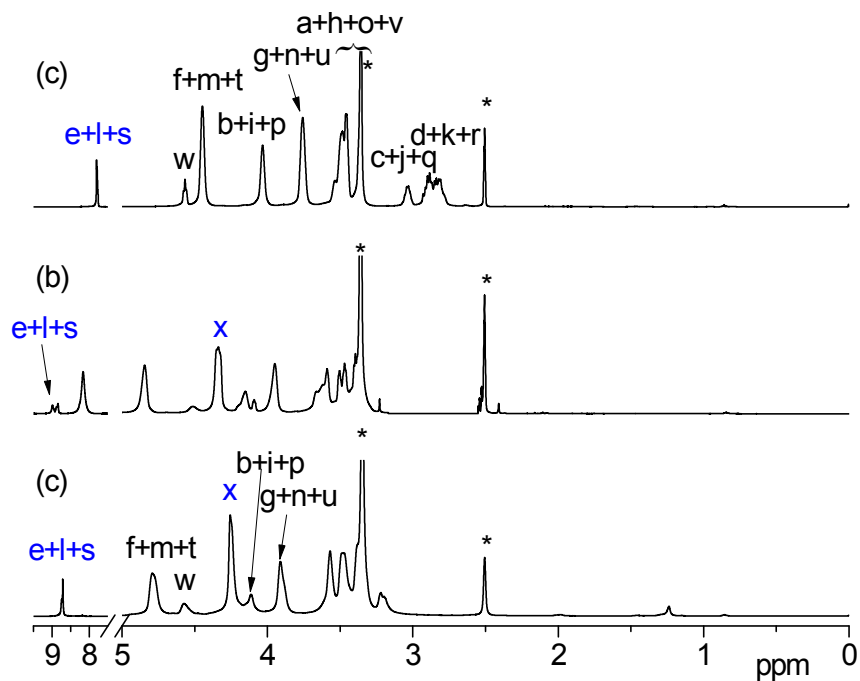

Fig. S3  $^1H$  NMR spectra of (a) *hb*-PTA-TEG, (b)  $[hb\text{-PTA-TEG}]^+I^-$ , and (c)  $[hb\text{-PTA-TEG}]^+[TFSI]^-$  in  $DMSO-d_6$ .

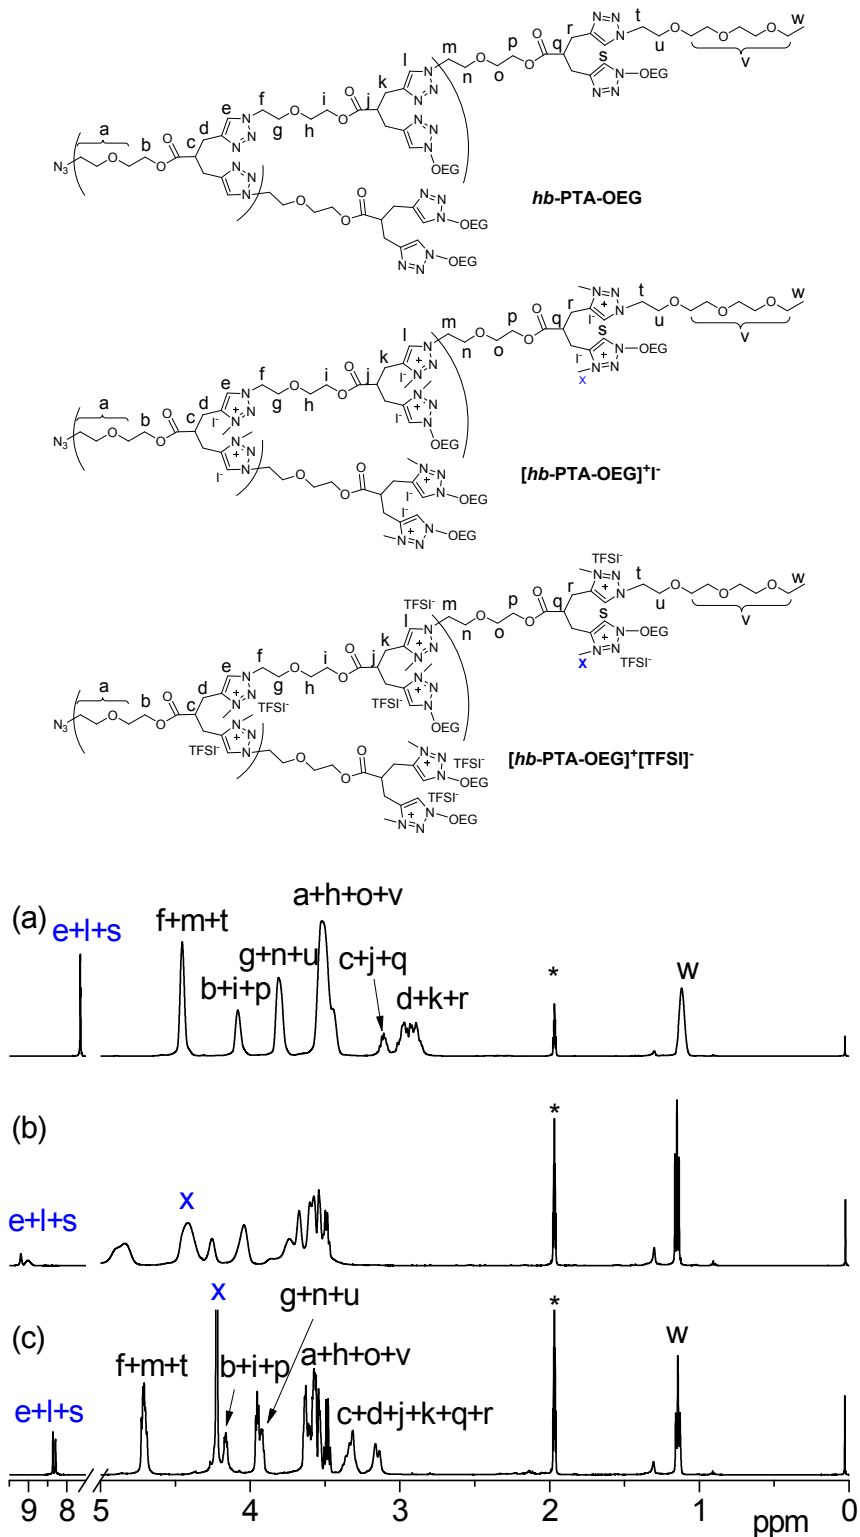

Fig. S4 <sup>1</sup>H NMR spectra of (a) *hb*-PTA-OEG, (b) [*hb*-PTA-OEG]<sup>+</sup>I<sup>-</sup>, and (c) [*hb*-PTA-OEG]<sup>+</sup>[TFSI]<sup>-</sup> in CD<sub>3</sub>CN.

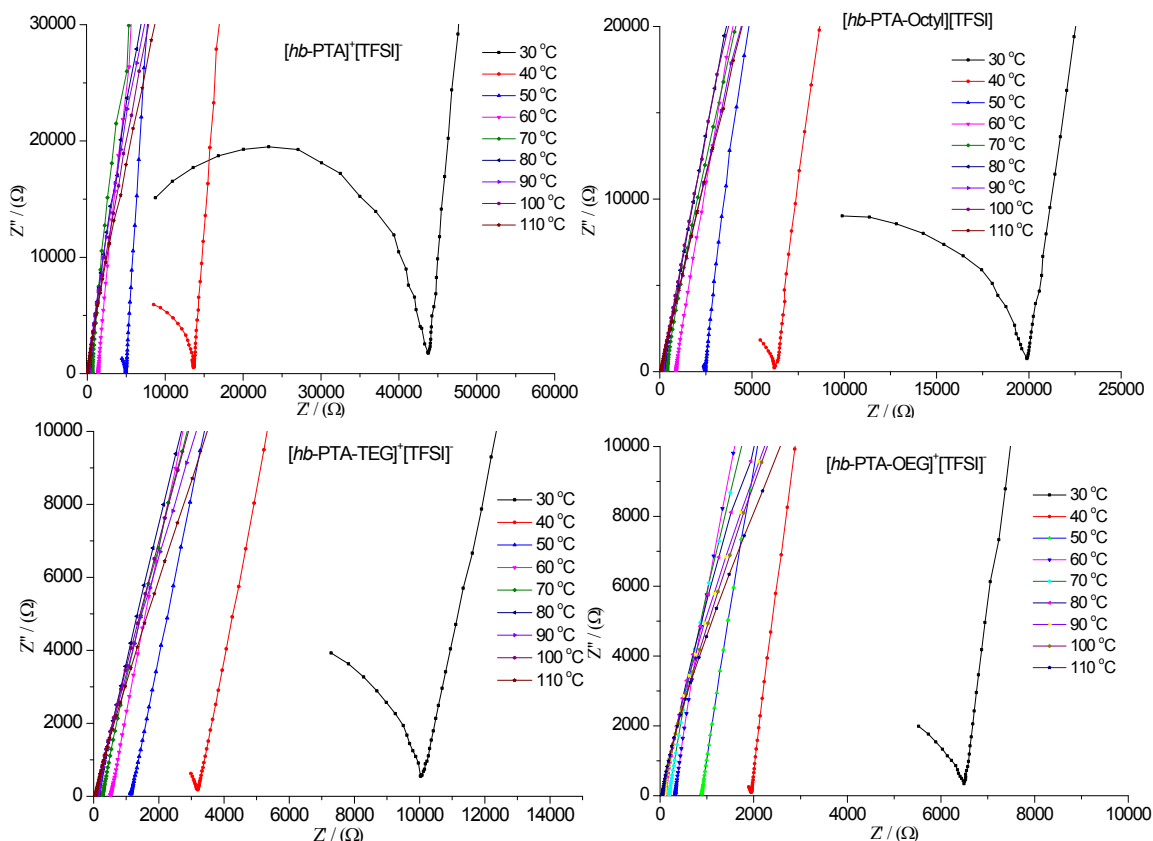

**Fig. S5** Nyquist plots of  $[\text{hb-PTA}]^+[\text{TFSI}]^-$ ,  $[\text{hb-PTA-Octyl}]^+[\text{TFSI}]^-$ ,  $[\text{hb-PTA-TEG}]^+[\text{TFSI}]^-$ , and  $[\text{hb-PTA-OEG}]^+[\text{TFSI}]^-$  at various temperatures.

**Table S1** Ionic conductivity of  $[\text{hb-PTA}]^+[\text{TFSI}]^-$ ,  $[\text{hb-PTA-Octyl}]^+[\text{TFSI}]^-$ ,  $[\text{hb-PTA-TEG}]^+[\text{TFSI}]^-$ , and  $[\text{hb-PTA-OEG}]^+[\text{TFSI}]^-$  at various temperatures

| T<br>(°C) | $[\text{hb-PTA}]^+[\text{TFSI}]^-$<br>(S cm <sup>-1</sup> ) | $[\text{hb-PTA-Octyl}]^+[\text{TFSI}]^-$<br>(S cm <sup>-1</sup> ) | $[\text{hb-PTA-TEG}]^+[\text{TFSI}]^-$<br>(S cm <sup>-1</sup> ) | $[\text{hb-PTA-OEG}]^+[\text{TFSI}]^-$<br>(S cm <sup>-1</sup> ) |
|-----------|-------------------------------------------------------------|-------------------------------------------------------------------|-----------------------------------------------------------------|-----------------------------------------------------------------|
| 30        | $1.13 \times 10^{-6}$                                       | $2.51 \times 10^{-6}$                                             | $4.98 \times 10^{-6}$                                           | $7.70 \times 10^{-6}$                                           |
| 40        | $3.67 \times 10^{-6}$                                       | $8.09 \times 10^{-6}$                                             | $1.58 \times 10^{-5}$                                           | $2.57 \times 10^{-5}$                                           |
| 50        | $1.01 \times 10^{-5}$                                       | $2.03 \times 10^{-5}$                                             | $4.37 \times 10^{-5}$                                           | $6.62 \times 10^{-5}$                                           |
| 60        | $3.58 \times 10^{-5}$                                       | $6.01 \times 10^{-5}$                                             | $9.54 \times 10^{-5}$                                           | $1.54 \times 10^{-4}$                                           |
| 70        | $8.04 \times 10^{-5}$                                       | $1.29 \times 10^{-4}$                                             | $1.92 \times 10^{-4}$                                           | $2.62 \times 10^{-4}$                                           |
| 80        | $2.02 \times 10^{-4}$                                       | $2.67 \times 10^{-4}$                                             | $3.70 \times 10^{-4}$                                           | $4.76 \times 10^{-4}$                                           |
| 90        | $3.09 \times 10^{-4}$                                       | $3.88 \times 10^{-4}$                                             | $5.15 \times 10^{-4}$                                           | $6.33 \times 10^{-4}$                                           |
| 100       | $4.63 \times 10^{-4}$                                       | $5.49 \times 10^{-4}$                                             | $7.35 \times 10^{-4}$                                           | $8.33 \times 10^{-4}$                                           |
| 110       | $5.81 \times 10^{-4}$                                       | $6.94 \times 10^{-4}$                                             | $8.93 \times 10^{-4}$                                           | $1.02 \times 10^{-3}$                                           |
